# Supplementary material
Source: PubMed Central journal article supplement (PMC2084071)

## Normalized to Baseline Template

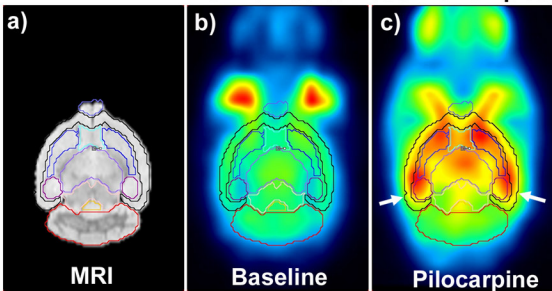

## Normalized to Pilocarpine Template

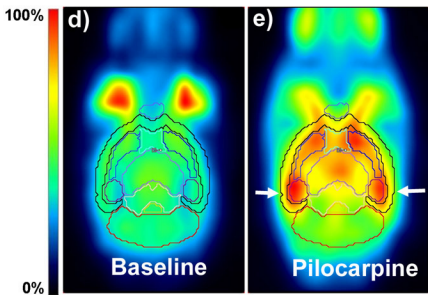

Supplementary Figure-1

Supplement: NIHMS31881-supplement-01.pdf [file NIHMS31881-supplement-01.pdf]

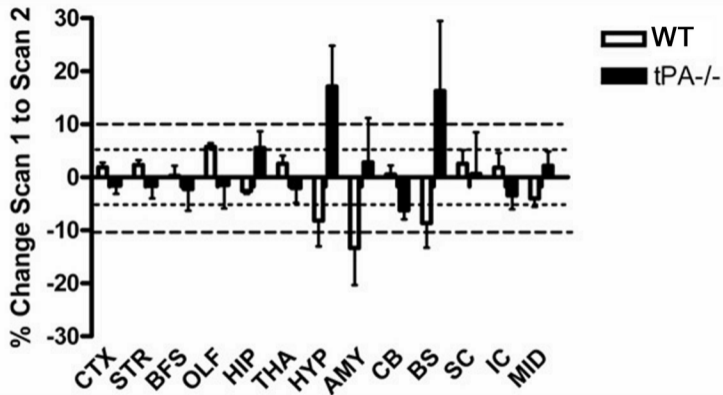

Supplementary Figure-2

Supplement: NIHMS31881-supplement-02.pdf [file NIHMS31881-supplement-02.pdf]

### Methyl Scopolamine Only

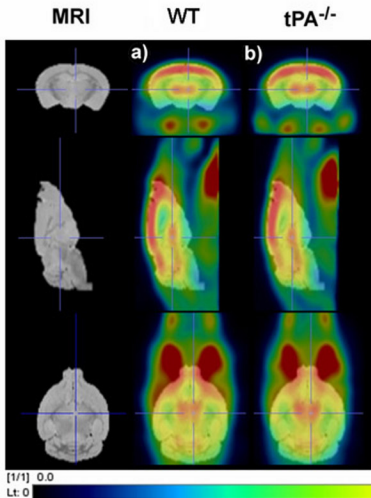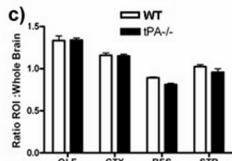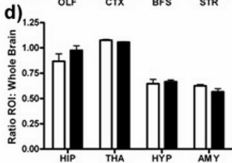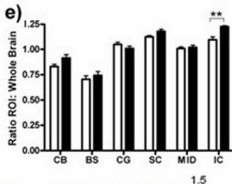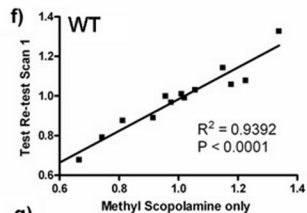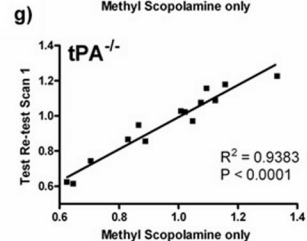

Supplementary Figure-3

Supplement: NIHMS31881-supplement-03.pdf [file NIHMS31881-supplement-03.pdf]
